# Supplementary material for: A New Case of Syringocystadenocarcinoma Papilliferum: A Rare Pathology for a Wide-Ranging Comprehension
Source: Hindawi journal article supplement (doi:10.1155/2014/453874), 2014-01-01

**A new case of Syringocystadenocarcinoma Papilliferum. A rare pathology for a wide-ranging comprehension**

**Supplementary Figure Legend**

**Figure S1.** Immunohistochemical staining demonstrates c-kit at the basal layer of neoplastic budding with diffuse, scattered c-kit positive spindle cells in the perineoplastic stroma (original magnification  $\times 100$ ).

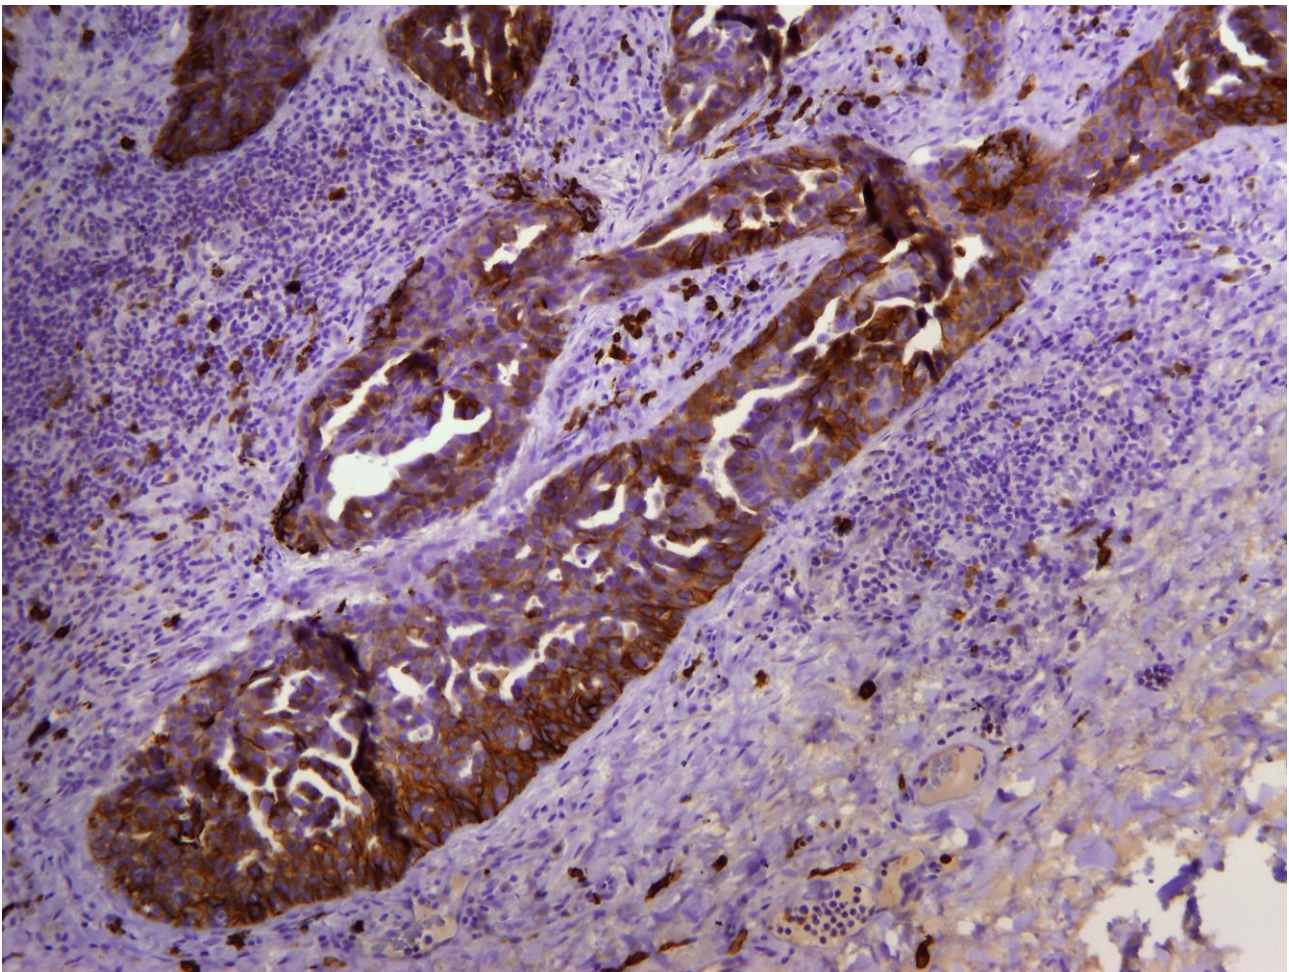

**Figure S2.** Some stroma cells with mesenchymal phenotype and few cell in the bulge squamous area of neoplasia are Nestin- positive (original magnification  $\times 400$ ).

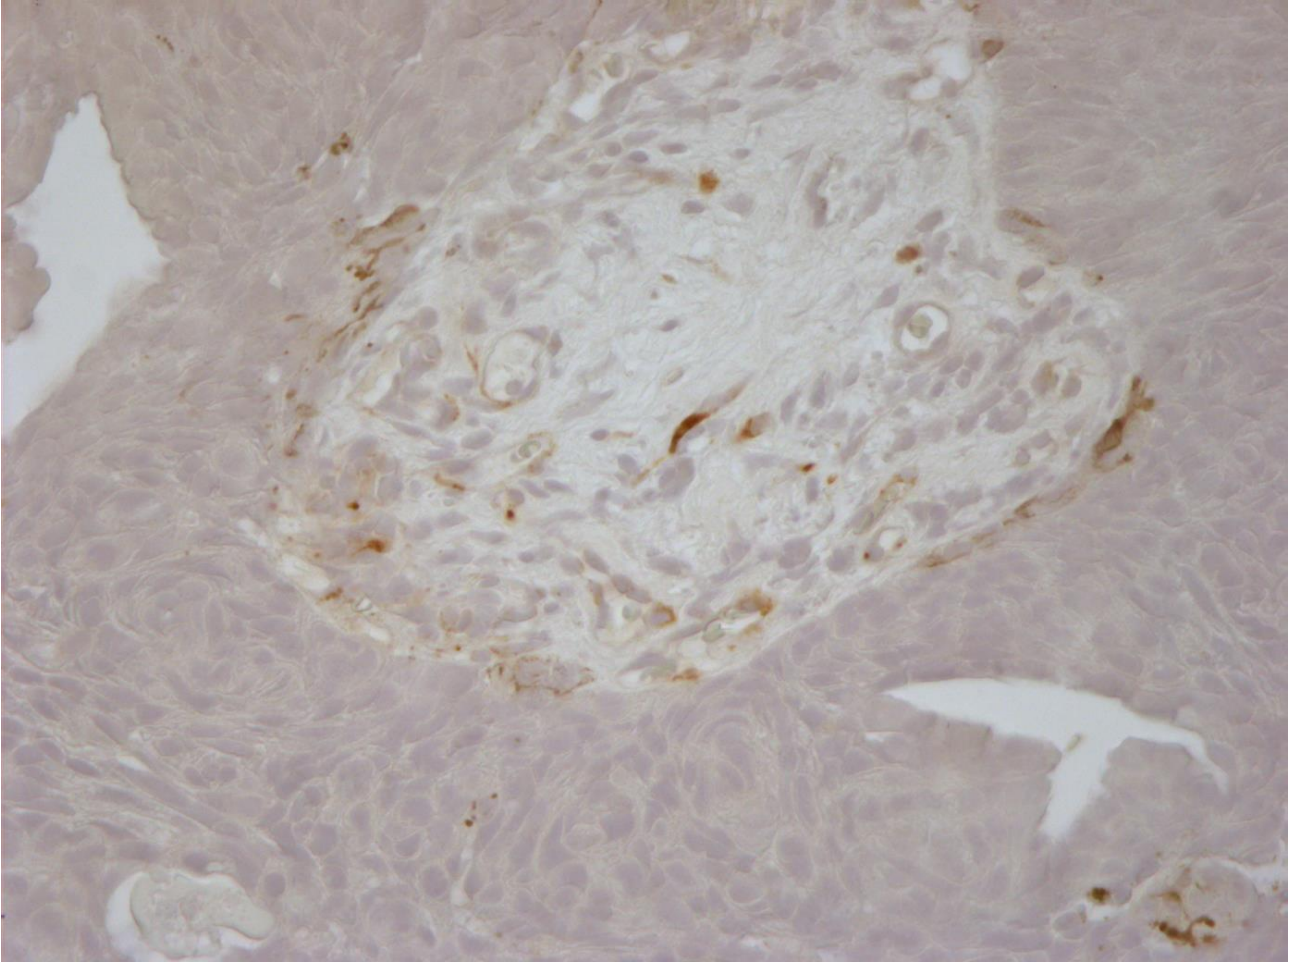



**Figure S3.** Immunofluorescence for CD44 antibody shows spreading of neoplastic cells in the stroma. Some mesenchymal cells are CD44- positive too (original magnification  $\times 200$ ).

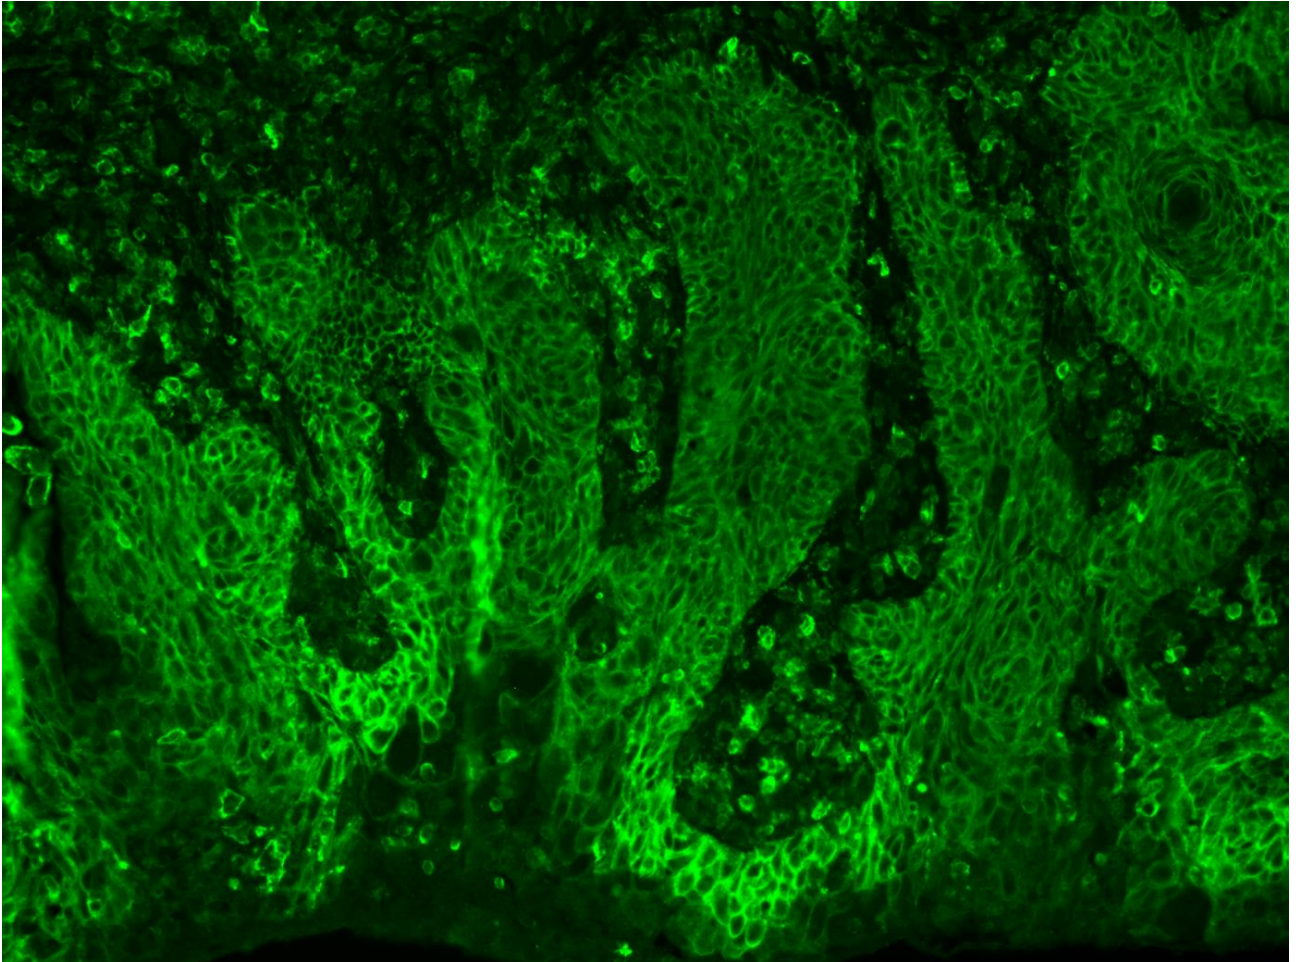

Supplement: f1 [file 453874.f1.pdf]
